# Supplementary material for: Optimizing workflow efficiency for analyzing low molecular weight endogenous peptides in colostrum
Source: Royal Society of Chemistry journal article supplement (doi:10.1039/d4ra03199g), 2024-01-01
Supplement: d4ra03199g1.pdf [file d4ra03199g1.pdf]

**Supplementary Table S1: Different criteria used to evaluate the efficiency of TCA and MWCO extraction methods:**

| S.No. | criteria                                                           | TCA    | MWCO   |
|-------|--------------------------------------------------------------------|--------|--------|
| 1     | Number of peptides identified                                      | 3211   | 3210   |
| 2     | Number of unique peptides                                          | 2942   | 2884   |
| 3     | Percentage peak area occupied by total peptides                    | 55.12% | 41.44% |
| 4     | Percentage peak area occupied by shared peptides                   | 15.44% | 13.57% |
| 5     | Percentage peak area of key peptides                               | 0.9%   | 1.88%  |
| 6     | Number of parent protein                                           | 2647   | 2587   |
| 7     | Percentage of peptides having score more than 0.5 in PeptideRanker | 26.41% | 27.25% |
| 8     | Percentage of peptides having score more than 0.1 in PeptideRanker | 89.44% | 89.46% |
| 9     | Number of key EPs identified                                       | 13     | 20     |
| 10    | Amino acid at 1 <sup>st</sup> position                             | K>L>Q  | L>K>P  |
|       | 2 <sup>nd</sup> position                                           | L>P>A  | P>L>V  |
|       | 3 <sup>rd</sup> position                                           | L>P>S  | L>P>V  |
|       | 4 <sup>th</sup> position                                           | L>P>A  | L>P>A  |
|       | 5 <sup>th</sup> position                                           | L>P>S  | L>P>G  |

**Supplementary Table S2: Percentage peak area occupied by some representative EPs extracted via TCA precipitation and MWCO methods:**

| S.No. | Peptide reported in literature | Peak area occupied (%) |        |
|-------|--------------------------------|------------------------|--------|
|       |                                | TCA                    | MWCO   |
| 1     | EPVLGPVRGP                     | 0.1052                 | 0.1178 |
| 2     | VLGPVRGPFP                     | 0.0300                 | 0.1670 |
| 3     | EPVLGPVRGPFP                   | 0.5559                 | 1.5174 |
| 4     | SQSKVLPVPQKAVPYPQ              | 0.0203                 | 0.0092 |
| 5     | TPVVVPPFL                      | 0.0043                 | 0.0144 |
| 6     | KVLPVPQ                        | 0.0477                 | 0.0379 |
| 7     | RPKHPIKHQ                      | 0.1369                 | 0.015  |
| 8     | KVLPVPQK                       | 0.0136                 | 0.0111 |
